# Supplementary material for: An Exploratory Cohort Study of the Association Between the Level of Testosterone and Suicidal Ideation in the Hospitalized Adolescent Female With Depression in China
Source: Research Square preprint supplement (doi:10.21203/rs.3.rs-535908/v1), 2021-05-25
Supplement: Supplementary file 1 [file 081fb0c831c9c4c4fa01c196.docx]

Appendix

Table 3. The Odds Ratios of Primary Outcome: NSSI

|  | Reference | Comparison | OR (95% CI) | p value |
| --- | --- | --- | --- | --- |
| Testosterone (nmol/L) | 1.19 | 2.03 | 1.18 (0.68, 2.03) | 0.56 |
| Age | 13 | 14 | 1.16 (0.80, 1.67) | 0.43 |
| Somatization | 1.67 | 3.25 | 2.37 (0.95, 5.93) | 0.07 |
| Horror | 2 | 3.29 | 0.98 (0.46, 2.08) | 0.95 |
| Hostile | 2.33 | 4 | 1.83 (0.75, 4.47) | 0.18 |
| Family Mental Disorder History | No | Yes | 2.00 (0.63, 6.33) | 0.24 |
| Divorce | No | Yes | 2.35 (0.59, 9.45) | 0.23 |
| Single Child | No | Yes | 0.68 (0.30, 1.55) | 0.36 |
|  |  |  |  |  |

Note: Differences (point estimates) in the suicidal ideation in the linear regression analyses reflect a comparison between the 25th and the 75th percentile values for each continuous variable among all 113 patients in the cohort.

Table 4. The Odds Ratios of Primary Outcome: Suicide Attempt

|  | Reference | Comparison | OR (95% CI) | p value |
| --- | --- | --- | --- | --- |
| Testosterone (nmol/L) | 1.19 | 2.03 | 0.69 (0.37, 1.38) | 0.29 |
| Age | 13 | 14 | 1.82 (1.08, 3.08) | 0.02 |
| Somatization | 1.67 | 3.25 | 1.15 (0.39, 3.37) | 0.80 |
| Horror | 2 | 3.29 | 0.71 (0.27, 1.88) | 0.49 |
| Hostile | 2.33 | 4 | 1.73 (0.57, 5.28) | 0.34 |
| Family Mental Disorder History | No | Yes | 3.89 (1.06, 14.25) | 0.04 |
| Divorce | No | Yes | 0.54 (0.06, 4.85) | 0.58 |
| Single Child | No | Yes | 1.77 (0.62, 5.03) | 0.28 |
|  |  |  |  |  |

Note: Differences (point estimates) in the suicidal ideation in the linear regression analyses reflect a comparison between the 25th and the 75th percentile values for each continuous variable among all 113 patients in the cohort.
